# Supplementary material for: Mobile phone brief intervention applications for risky alcohol use among university students: a randomized controlled study
Source: Springer Nature journal article supplement (doi:10.1186/1940-0640-9-11), 2014-07-02

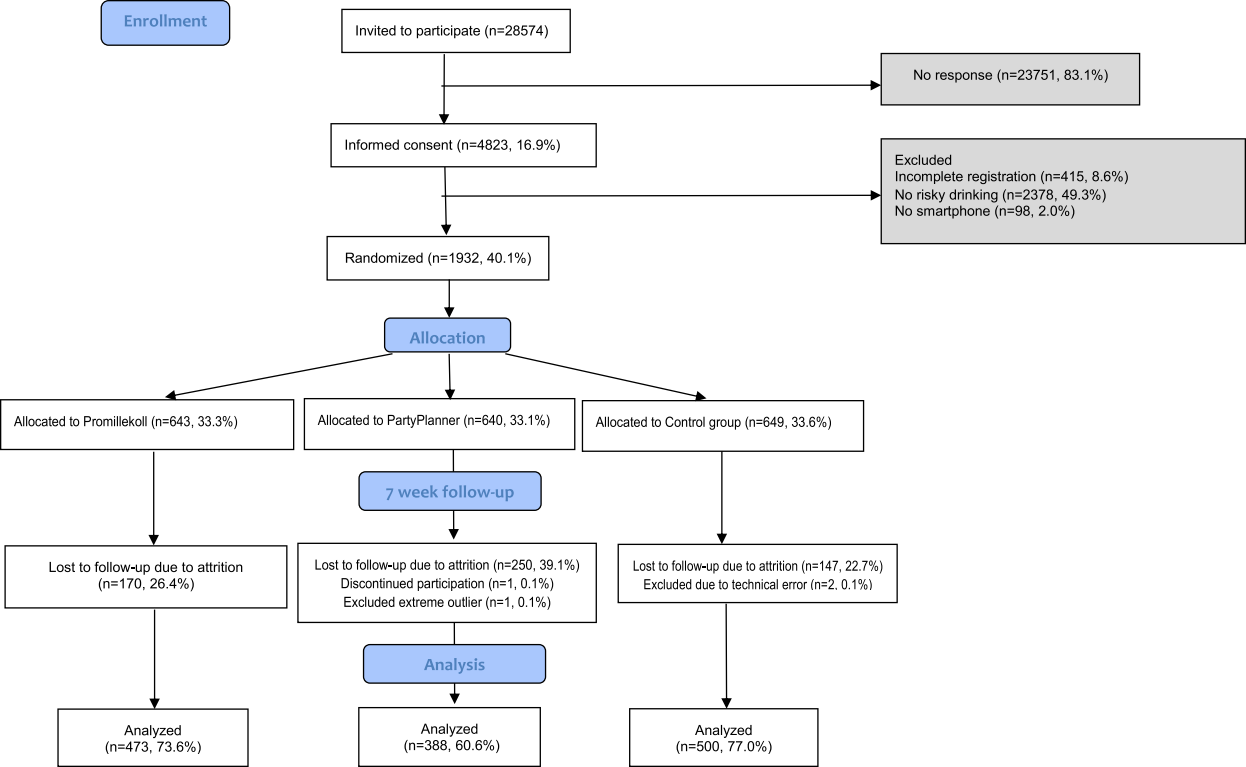

Supplement: 13722_2013_243_MOESM1_ESM.pdf [file 13722_2013_243_MOESM1_ESM.pdf]
